1 **Title page**

2 **Two independent loss-of-function mutations in *anthocyanidin synthase* homeologous**  
3 **genes make sweet basil all green**

4 Itay Gonda<sup>1,\*</sup>, Mohamad Abu-Abied<sup>1</sup>, Chen Adler<sup>1</sup>, Renana Milavsky<sup>1,2</sup>, Ofir Tal<sup>1</sup>, Rachel  
5 Davidovich-Rikanati<sup>1</sup>, Adi Faigenboim<sup>1</sup>, Tali Kahane-Achinoam<sup>1</sup>, Alona Shachter<sup>1</sup>, David  
6 Chaimovitch<sup>1</sup>, Nativ Dudai<sup>1,2,\*</sup>

7 <sup>1</sup> Unit of Aromatic and Medicinal Plants, Newe Ya'ar Research Center, Agricultural  
8 Research Organization, Volcani Institute, Ramat-Yishay, Israel

9 <sup>2</sup> The Hebrew University of Jerusalem, Faculty of Agriculture, Rehovot, Israel

10 \* Corresponding authors: [itaygonda@agri.gov.il](mailto:itaygonda@agri.gov.il); [nativdud@gmail.com](mailto:nativdud@gmail.com)

11 The date of submission: 16-May-2022

12 Number of tables: 1

13 Number of figures: 7

14 Word count (start of the introduction to the end of the acknowledgments, excluding materials  
15 and methods): 4060

16 Number of supplementary tables: 8

17 Number of supplementary figures: 6

18 Running title: Genetic mapping of anthocyanins in sweet basil

19 **Highlight**

20 Genome-based genetic mapping of the inflorescence anthocyanins content was used to pin  
21 the loss-of-function mutations in *anthocyanidin synthase* genes in the tetraploid sweet basil.

22 **Abstract (up to 200 words)**

23 Sweet basil, *Ocimum basilicum* L., is an important culinary herb grown worldwide. Although  
24 basil is green, many landraces, breeding lines and exotic cultivars have purple stems and  
25 flowers. This anthocyanins pigmentation is unacceptable in the traditional Italian basil. We  
26 used the recently published sweet basil genome to map quantitative trait loci (QTL) for  
27 flower and stem color in a bi-parental F<sub>2</sub> population. It was found that the pigmentation is  
28 governed by a single QTL, harboring an anthocyanidin synthase (ANS) gene. Further  
29 analysis revealed that the basil genome harbors two homeologous ANS genes, each carrying  
30 a loss-of-function mutation. *ObANS1* carries a 1-bp insertion, and *ObANS2* carries a missense  
31 mutation within the active site. In the purple-flower parent, ANS1 is functional and ANS2  
32 carries a nonsense mutation. The functionality of the active allele was validated by  
33 complementation in an Arabidopsis ANS mutant. Moreover, we have restored the  
34 functionality of the missense-mutated ANS2 using site-directed activation. We found that the  
35 non-functional alleles were expressed to similar levels as the functional allele, suggesting  
36 polyploids invest futile effort in expressing non-functional genes, harming their superior  
37 redundancy. We show here we can harness basil's genomics and genetics to understand the  
38 basic mechanism of metabolic traits.

39 **Keywords**

40 *Anthocyanidin synthase*, anthocyanins, genetic mapping, homeologous genes, loss-of-  
41 function, sweet basil, tetraploidy

42 **Abbreviations**

43 ANS, anthocyanidin synthase; LG, linkage group; QTL, quantitative trait loci

## 44 **Introduction**

45 Basil, *Ocimum basilicum* L., of the *Lamiaceae* family, is a leading aromatic crop in  
46 agricultural fields and home gardens. It belongs to the genus *Ocimum*, which comprises up to  
47 160 different species (Paton *et al.*, 1999). *O. basilicum* harbors a large diversity among its  
48 genotypes depicting unique aromas, leaf sizes and shapes, leaf and stem color, inflorescence  
49 color and structure, grew habit and seeds morphology (Dudai and Belanger, 2016). These  
50 diverse genotypes have a wide range of uses, primarily as a culinary herb and as a source for  
51 essential oils and ornamentals. ‘Genovese’ basil, the type of basil used in the Italian Pesto  
52 sauce, is the most widespread basil grown globally. While commercial ‘Genovese’ basil are  
53 all green, markets also display purple basil or basil with purple stems and flowers.

54 Anthocyanins are a group of water-soluble pigments conferring purple, red and blue  
55 colors in multiple plants (Holton and Cornish, 1995). They exist in almost all plant species  
56 except from *Caryophyllales* that accumulate betalains pigments instead (Polturak and  
57 Aharoni, 2018; Tanaka *et al.*, 2008). The biosynthesis of anthocyanins is a multistep pathway  
58 that starts from the amino acid L-phenylalanine (Fig. 1). Several colorless or yellow  
59 intermediates precede the anthocyanins. The first enzyme that generates purple/blue/red  
60 pigments is anthocyanidin synthase (ANS; synonym: leucoanthocyanidin dioxygenase,  
61 LDOX), which oxygenates the leucoanthocyanidin substrate and generates colored  
62 anthocyanidin aglycons (Falcone Ferreyra *et al.*, 2012). Next, multiple sugar substitutions on  
63 various residues produce various colorful anthocyanins.

64 In basil, purple pigmentation is a common feature in the leaves, flowers and stems  
65 (Carović-Stanko *et al.*, 2011). While the term purple basil usually refers to the color of the  
66 leaves, green-leaf basil with purple flowers and stems are common (Phippen and Simon,  
67 1998). Various anthocyanins were characterized from basil plants, with cultivar being a major  
68 factor determining their levels (Flanigan and Niemeyer, 2014; Phippen and Simon, 1998;  
69 Prinsi *et al.*, 2019). The accumulation of anthocyanins in basil was also highly dependent on  
70 plant age (McCance *et al.*, 2016), peaking at flowering time (Phippen and Simon, 1998). Fall-  
71 grown purple basil (cv. Dark Opal) accumulated significantly higher levels of anthocyanins  
72 than summer-grown (Nguyen and Niemeyer, 2008). Phippen and Simon (2000) showed that  
73 two dominant alleles govern the inheritance of basil color by using a complete diallel cross in  
74 segregating F<sub>2</sub> individuals. They documented a high level of instability of purple leaf color  
75 seen in spotted or green/purple intermediate phenotypes of the offspring. That instability was

76 also observed in vegetative cuttings of purple basil, where the position of the cutting  
77 influenced its color retaining (Phippen and Simon, 2000).

78 This project aimed to understand the molecular basis of anthocyanins accumulation in  
79 sweet basil. We used a previously-developed F<sub>2</sub> population derived from a cross between a  
80 green cultivar and a purple-flower cultivar. Using genotyping-by-sequencing, we showed that  
81 a single quantitative trait loci (QTL) governs the color trait. Two mutations in the two ANS  
82 homologous genes were validated. Finally, we raise the question of whether polyploids pay  
83 penalties when they express more non-functional genes than diploids, eliminating their  
84 hypothesized advantage of redundancy.

## 85 **Materials and Methods**

### 86 **Plant material**

87 The F<sub>2</sub> mapping population was grown in greenhouse conditions as described in Gonda *et al.*  
88 (2022). Flower and stem color were visually evaluated on each F<sub>2</sub> plant in the greenhouse on  
89 the emergence of the first flower. For gene expression analysis, 3 plants of ‘Perrie’ cultivar  
90 and 3 plants of ‘Cardinal’ cultivar were grown in open field conditions with drip irrigation.  
91 Leaves samples were taken at 10 leaf-pairs stage, from the 7<sup>th</sup> and 8<sup>th</sup> pairs. Flowers were  
92 sampled after 2 months.

### 93 **DNA extraction, genotyping by sequencing and association mapping**

94 DNA extraction, GBS libraries construction, SNP calling and association mapping were  
95 described in Gonda *et al.* (2022).

### 96 **Linkage groups determination**

97 Linkage groups (LGs) were built with JoinMap v4.1. Briefly, of the 23,411 SNPs detected,  
98 only sites where both parents were homozygous continued the linkage analysis (using  
99 Tassel). The data was further filtered with JoinMap, and sites that did not show a disomic  
100 distribution of 1:2:1 were filtered out, and only one locus was kept when two loci were >  
101 95% similar. Then, when adjacent sites on the same scaffold were distant less than 2.13 Mbp  
102 (on average), only the site with less missing data was kept. Linkage analysis was performed  
103 with JoinMap using regression mapping with the Cosambi map function. The parameter used  
104 for grouping was recombination frequency from 0.5 to 0.05 with a step of -0.05. LGs were  
105 set, and map distances were calculated based on the grouping tree with the regression  
106 mapping function. Homeologous LGs were determined considering the BUSCO analysis of  
107 Gonda *et al.* (2020) that defined homeologous scaffolds.

## 108 **RNA-sequencing**

109 RNA sequencing, including RNA extraction, library preparation and gene expression analysis  
110 was performed as described in Gonda *et al.* (2020). In addition to the ‘Perrie’ cultivar, we  
111 also used the ‘Cardinal’ cultivar.

## 112 **Sequencing *ObANS* genes**

113 Flowers RNA was converted to cDNA using a synthesis kit (PCR Biosystems,  
114 <https://pcrbio.com/usa/>) after DNase treatment (Thermos Fisher scientific,  
115 <https://www.thermofisher.com/il/en/home.html>). Due to high identity between the  
116 homeologous copies, the ANS genes were amplified using a single pair of primers: F 5’  
117 ATGGTTGCTTCAATTACGGCA 3’; R 5’ CAACTAGATTTATCATCAACCACCACC 3’.  
118 The PCR products were cloned into pJET vector (Thermos Fisher scientific) and transformed  
119 into DH5 $\alpha$  competent cells plated on LB medium containing ampicillin for selection. Ten  
120 individual colonies were grown overnight, the plasmids were extracted, and the inserts were  
121 sequenced from all colonies to address all possible insert fragments. To restore the  
122 functionality of the H292Q mutation of *ObANSI\_Perrie* we used the following primers: F 5’  
123 CAAAAGCATTCTGCACCGCGCCTCCGTCAA 3’; R 5’  
124 TTGACGAGGCCGCGGTGCAGAATGCTTTTG 3’.

## 125 **Complementation test of *ObANS* genes in Arabidopsis**

126 All *ObANS* genes were inserted into the pBI121 plasmid under the control of the constitutive  
127 Cauliflower mosaic virus 35S promoter using the SacI and XbaI restriction enzymes  
128 (Thermo-scientific) and the NEBuilder ligation system (NEB). The plasmids were  
129 transformed into *Agrobacterium tumefaciens* strain GV3101 using electrotransformation and  
130 positive colonies were selected with kanamycin. Agrotransformation of Arabidopsis plants  
131 with T-DNA insertion at the *AtANS* gene (SALK\_073183, Ohio State University Arabidopsis  
132 Biological Resource Center, <https://abrc.osu.edu/>), were performed using the floral dip  
133 technique (Clough and Bent, 1998). The F<sub>1</sub> seeds then germinated on a kanamycin-  
134 containing MS medium, and seedlings harboring the plasmid were grown, followed by F<sub>2</sub>  
135 seeds collection. The F<sub>2</sub> plants were grown on a kanamycin-containing MS medium at 20°C  
136 with a 12h photoperiod.

## 137 **Anthocyanins extraction**

138 Flowers tissues of 3 plants of both ‘Perrie’ and ‘Cardinal’ cultivars were collected and flash-  
139 frozen in liquid N<sub>2</sub>. Samples were then ground to uniform powder. Afterward, 100 mg of

140 tissue was weighed, 200  $\mu$ l of 80% methanol was added, and samples were vigorously  
141 vortexed. Samples were then sonicated for 20 min at RT followed by 10 min centrifugation at  
142 21,000  $g$  at 4°C. The extraction procedure was repeated twice. Finally, the samples were  
143 filtered through a syringe filter of 0.22  $\mu$ m (GHP Membrane, PALL, USA) to new amber  
144 vials.

#### 145 **Anthocyanins analysis**

146 Liquid chromatography/time of-flight/mass spectrometry (LC-TOF-MS) analysis was  
147 carried out on an Agilent 1290 Infinity series liquid chromatograph coupled with an Agilent  
148 1290 Infinity DAD and Agilent 6530C Accurate Mass quadrupole Time of Flight (qTOF)  
149 mass spectrometer (MS) (Agilent Technologies, Santa Clara, USA). Compounds were  
150 separated on a Zorbax Extend-C18 Rapid Resolution HT column (2.1  $\times$  50 mm, 1.8  $\mu$ m;  
151 Agilent Technologies). The gradient elution mobile phase consisted of H<sub>2</sub>O with 0.1% (v/v)  
152 formic acid (eluent A) and acetonitrile containing 0.1% (v/v) formic acid (eluent B). The  
153 column was equilibrated with 1% B at a flow rate of 0.3 mL  $\times$  min<sup>-1</sup> for 1 min, then increased  
154 to 80% B by the following steps: 2-3 min, 20% B; 4-5 min, 30% B; 10-11 min, 50% B; 12-13  
155 min, 80% B. Column was washed with 95 % B at 14 min for 1 min and readjusted to 1% B  
156 for 2 minutes. The eluted compounds were subjected to Jet Stream electrospray ionization  
157 interface (ESI) operated in positive mode with the following settings: 8 L  $\times$  min<sup>-1</sup> gas at  
158 300°C, 35 p.s.i. nebulizer pressure, 10 L  $\times$  min<sup>-1</sup> sheath gas at 300°C, capillary voltage  
159 (VCap) of 3,000 V, fragmentor to 140 V, and skimmer to 65 V. Data was collected from  
160 mass/charge (m/z) ratio of 100-1,700. The flow rate of the mobile phase was 0.3 mL  $\times$  min<sup>-1</sup>  
161 and the column oven temperature was 30 °C. The main (therefore representative) ions formed  
162 in ESI source (mainly [M]<sup>+</sup>; [M+H]<sup>+</sup>; [M+Na]<sup>+</sup>) of target compounds were detected using the  
163 'find compound by formula' function and analyzed by Masshunter qualitative and  
164 quantitative analysis software version B.07.00 (Agilent technologies). For untargeted  
165 analysis, the platform of MPP (Mass profiler professional, Agilent Technologies) was used.  
166 In total, 432 compounds were integrated using molecular feature of which 107 showed > 2  
167 fold change between 'Perrie' and 'Cardinal' samples (Moderate *t*-test, *p* < 0.05). Compounds  
168 were annotated using IDBrowser based on exact mass compared to METLIN Metabolite and  
169 Chemical Entity Database.

#### 170 **ANS sequence analyses and model predictions**

171 Sequence comparisons and alignments of both nucleotides and amino acids were done with  
172 Clustal Omega (<https://www.ebi.ac.uk/Tools/msa/clustalo/>) using default parameters and

173 visualized by BoxShade 3.21 ([https://embnet.vital-it.ch/software/BOX\\_form.html](https://embnet.vital-it.ch/software/BOX_form.html)).  
174 Evolutionary conservation scores were calculated by ConSurf (Ashkenazy *et al.*, 2016) for  
175 each of the ANS variants. ANS models were predicted using RaptorX (Källberg *et al.*, 2012).  
176 AtANS (PDB 1gp6) was used as a template (Wilmouth *et al.*, 2002). For electrostatic surface  
177 potential, hydrogens were added using PROPKA (Olsson *et al.*, 2011) followed by  
178 calculation of the electrostatic potentials by APBS (Dolinsky *et al.*, 2007). Secondary  
179 structure fold prediction was done by HHpred (Söding *et al.*, 2005).

180

## 181 **Results**

### 182 **Phenotyping the population for color traits**

183 Many basil landraces and accessions have pink/purple flowers, while most cultivars found on  
184 markets have white/green flowers. We used a bi-parental population derived from a cross  
185 between the Genovese cultivar ‘Perrie’ and the ornamental cultivar ‘Cardinal’ (Dudai *et al.*,  
186 2018) to study the genetic basis for color traits. ‘Perrie’ has a green stem, green bracts and  
187 sepals, and white petals, while ‘Cardinal’ has a purplish stem, deep purple bracts and sepals  
188 and pink petals (Supplementary Fig. S1 at *JXB* online). The purple color results from the  
189 presence of four different anthocyanins with various glycoside substitutions, as was observed  
190 by LC-TOF analysis (Supplementary Table S1 at *JXB* online). The F<sub>1</sub> plants had purple  
191 flowers but not as intense as the ‘Cardinal’ flower (Supplementary Fig. S1). Next, 173 F<sub>2</sub>  
192 segregants were grown and visually scored for the color of the flower parts and the stem. The  
193 flower and stem color segregated in the F<sub>2</sub> offspring and displayed varying intensities of  
194 purple color. There was an agreement between all non-colored individuals in all traits;  
195 offspring with white petals had green stems, bracts and sepals.  $\chi^2$  distribution analysis  
196 showed that the ratio between the white/green phenotype to the pink/purple phenotype fits a  
197 3:1 single dominant gene inheritance model (Table 1). A look at the intensities of the purple  
198 color suggested an intermediate phenotype exists, subdividing the purple phenotype to deep-  
199 and light-purple (Table 1; Fig. 2). Although there was no complete agreement on purple  
200 intensities among sepals, stem and bracts, contingency analysis within purple segregants  
201 only, indicated that the color intensities among these tissues are related to each other  
202 (Supplementary Table S2). We have further tested the possibility that the intermediate purple  
203 phenotypes resulted from a single gene in an incomplete dominance model. The colors of the  
204 bracts, but not the other tissues, were segregated in a 1:2:1 ratio according to the  $\chi^2$   
205 probability test (Table 1).

## 206 **Population's genotyping and linkage groups construction**

207 The population was genotyped with GBS, as described in Gonda *et al.* (2022). Briefly,  
208 23,411 polymorphic sites between 'Perrie' and 'Cardinal' were generated for the mapping  
209 population. The heterozygosity levels were 9% for 'Perrie', 33% for 'Cardinal', and the  
210 population's mean was  $51\% \pm 0.7$ .

211 We next build linkage groups (LGs) and a genetic map based on the SNPs data. To  
212 reduce the complexity of the data, we have further filtered the SNPs to have a minimum  
213 genotyping depth of 10. The generated ABH genotype (A, 'Perrie'; B, 'Cardinal') contained  
214 11,857 sites (excluding sites where at least one of the parents was heterozygous). The data  
215 was further filtered with JoinMap, and sites that did not show a disomic distribution of 1:2:1  
216 were filtered out, and only one locus was kept when two loci were  $> 95\%$  similar. Then,  
217 when adjacent sites on the same scaffold were distant less than 2.13 Mbp (on average), only  
218 the site with less missing data was kept. This rigorous filtering resulted in 867 sites spreading  
219 over 152 scaffolds. We detected 24 linkage groups, but the average size was only 24 cM (SD  
220 = 21.3cM), and the median was 14 cM. Moreover, the SNPs did not order sequentially  
221 according to their scaffolds within most of the linkage groups (see examples in  
222 Supplementary Fig. S2). Hence, we only divided the scaffolds into LGs and did not continue  
223 to pseudomolecules scaffolding. Based on the BUSCO analysis performed by Gonda *et al.*  
224 (2020), we have determined homeology between LG couples that were arbitrarily classified  
225 into subgenomes A or B (Supplementary Table S3). We also detected chimeric scaffolds that  
226 span over 2 or 3 LGs (Supplementary Tables S3-4).

## 227 **Association mapping of the color traits**

228 Due to the high heterozygosity level of the 'Cardinal' parent and the short genetic sizes of the  
229 linkage groups generated, we performed an association analysis rather than QTL mapping. To  
230 reduce complexity and false positives, we filtered the data to sites with  $DP > 15$ . That  
231 resulted in 8,496 polymorphic sites (including sites where one of the parents was  
232 heterozygous), which were checked for associations with the various color phenotypes. The  
233 results showed that no matter which color trait was tested, three scaffolds were strongly  
234 associated with the color traits: 393, 2608 and 7350 (Fig. 3). These scaffolds belong to the  
235 same LG (LG 4A), which suggests that the QTL at LG 4A spans over the entire chromosome.  
236 Moreover, also scaffold 120, which belongs to LG 4B, showed association with all color  
237 traits. We then checked whether the alleles at the QTL (position 7350\_2,452,081) also  
238 contribute to the incomplete dominance we observed for bracts color phenotype (Fig. 4).



239 Nonparametric comparisons of each allele-pair using Wilcoxon analysis indicated that the  
240 heterozygous status is significantly different from each homozygous status ( $p$ -value  
241  $<0.0001$ ). The phenotypic variance explained by this locus is 62%, according to contingency  
242 analysis test.

### 243 **Resolving flower and stem color QTL**

244 The observed intervals of several to dozens Mbp make it challenging to resolve the QTL and  
245 find the causative molecular factor using forward genetics only. To overcome that hurdle, we  
246 have adopted a reverse genetics approach with candidate genes from the anthocyanins  
247 biosynthetic pathway. We used tblastn algorithm to scan the basil genome for the entire  
248 anthocyanins biosynthetic pathway genes. We found that the entire pathway is duplicated in  
249 the ‘Perrie’ genome with copies in homeologous scaffolds (Supplementary Table S5). The  
250 only gene found in the color QTL scaffolds was the gene encoding for anthocyanidin  
251 synthase (ANS) enzyme. One copy of ANS gene was found in scaffold 7350 (termed  
252 *ObANS1*) and another copy was found in scaffold 120 (termed *ObANS2*) (Supplementary  
253 Table S5). Both genes were predicted to include two exons and are 96% identical in the  
254 nucleotide level, the intron however, is more divergent with 85% identities. Two molecular  
255 scenarios can explain the no anthocyanins phenotype of ‘Perrie’ flowers: 1) the expression of  
256 both ANS copies is suppressed in ‘Perrie’ due to *cis*-acting elements, plausibly located in the  
257 promoter; 2) ‘Perrie’ copies of ANS carry mutations in comparison to ‘Cardinal’ altering  
258 their activity. The expression levels of both *ObANS* genes was monitored in the flowers and  
259 the leaves of both genotypes using RNA-seq analysis. In both cultivars, both ANS genes were  
260 highly expressed in the flowers and hardly expressed in the leaves (Fig. 5). *ObANS2* was not  
261 differentially expressed between the two cultivars. *ObANS1* showed significantly higher  
262 expression levels in ‘Cardinal’ flowers than in ‘Perrie’ flowers. Yet, this difference in  
263 expression cannot explain the no anthocyanins phenotype of ‘Perrie’ flowers. Interestingly,  
264 both ‘Perrie’ and ‘Cardinal’ expressed the entire homeologous sets of anthocyanins  
265 biosynthetic genes (Table S6).

### 266 ***ObANS* enzymes sequence analysis**

267 Next, we looked for possible causative polymorphic sites between ‘Perrie’ and ‘Cardinal’.  
268 For that, we have extracted and sequenced the coding region of the ANS genes from cDNA  
269 of ‘Perrie’ and ‘Cardinal’ flowers. ANS1\_Perrie carries a 1-bp deletion at position 993 bp  
270 (Supplementary Fig. S3, red shaded) in comparison to ANS1\_Cardinal and ANS2 from both  
271 cultivars. ANS1\_Cardinal carries a 9-bp deletion after 1,077 bp (Supplementary Fig. S3, light

272 blue shaded). Several other SNPs were evident among the four ANS genes with 96.3 to 98.1  
273 % identities (Supplementary Table S7). To understand the functional outcome of these  
274 deletions and SNPs, we have aligned basil ANS protein sequences along with the protein  
275 sequence of the Arabidopsis ANS (AtANS), that its' structure was resolved using X-ray  
276 crystallography (Wilmouth *et al.*, 2002). The 9-bp deletion in ObANS1\_Cardinal did not  
277 seem to cause deletion in functionally important amino acids. All the critical amino acids  
278 according to AtANS were conserved in ObANS1\_Cardinal (Fig. 6), suggesting it encodes a  
279 functional enzyme. In ANS1\_Perrie, the 1-bp deletion did not cause a premature stop codon,  
280 yet the frameshift causes major variations in the last 58 amino acids of the protein (Fig. 6).  
281 That resulted in a protein with only ~83% amino acid identities with other basil ANSs that  
282 are 95-98% identical (Supplementary Table S8). According to the crystal structure of AtANS,  
283 this arm of the enzyme harbors four amino acid residues that are important to the binding of  
284 the substrate. In ANS1\_Perrie, these four amino acids were not conserved due to the  
285 frameshift plausibly altering its functionality. ObANS2\_Cardinal carries a G → T mutation at  
286 position 460 (Supplementary Fig. S3, yellow shaded), resulting in a premature stop codon  
287 after only 153 amino acids that are 211 amino acids short of the full protein (Fig. 6). Finally,  
288 ObANS2\_Perrie carries a C → G mutation at position 876 (Supplementary Fig. S3, green  
289 shaded), resulting in an amino acid substitution at position 292, replacing histidine with  
290 glutamine (Fig. 6). That H292Q mutation is at a histidine residue that is one of the three  
291 residues docking the Fe<sup>++</sup> ion in the enzyme's active site (Wilmouth *et al.*, 2002).

## 292 **Models for ANS**

293 To evaluate the effect of the mutations in the ANS enzymes of 'Perrie' and to estimate their  
294 contribution to the no anthocyanins phenotype, we have used a computational approach to  
295 predict their structure and functionality. First, we used ConSurf to calculate the structural  
296 evolutionary conservation of each sequence residue in the target chain (Supplementary Fig.  
297 S4). The lowest score represents the most conserved position in a protein. The His-292  
298 position in ANS proteins has a very low ConSurf score of -1.3, indicating a highly  
299 evolutionary conserved amino acid. Some positions downstream to residue 311, where the  
300 frameshift of ANS1\_Perrie occurred, are highly conserved from an evolutionary point of  
301 view which is often linked with functionally essential residues.

302 Next, we have constructed structure models for all four basil ANS enzymes. The  
303 Arabidopsis ANS crystal structure (1gp6; resolution of 1.75 Å), which shares ~ 80% amino  
304 acid identities with basil ANSs, was used as a template for modeling calculated by RaptorX.

305 First, we evaluated the influence of the H292Q substitution in ObANS2\_Perrie on the active  
306 site and its possible effects on binding and activity. The electrostatic potential of the active  
307 site's pocket is more negative in ObANS2\_Perrie due to the substitution (Supplementary Fig.  
308 S5 AB), hence altering substrate and cofactors affinities. As observed in ANS  
309 crystallographic structure in the PDB database, the catalytic site populates an Fe<sup>++</sup> ion as a  
310 cofactor, complexed with 2-oxoglutarate (2-OG) and the substrate *t*-dihydroquercetin (DHQ)  
311 to form the ANS:Fe(II):2OG:DHQ cluster (The natural substrate of ANS enzyme are  
312 leucoanthocyanidins, which are difficult to synthesize, and are unstable in a solution. Hence,  
313 the crystal structure of AtANS was resolved with DHQ). The Fe<sup>++</sup> is coordinated with His-  
314 232, His-288, Asp-234, and a bidentate interaction with 2-OG in the 1pg6 structure, which  
315 are aligned with His-236, His-292 and Asp-238 respectively in the 'Perrie' and the 'Cardinal'  
316 variants (Supplementary Fig. S5 C). Three other coordination axes are held by two water  
317 molecules and a single succinate molecule. As indicated in the literature, the residues which  
318 mostly form coordination interactions with Fe<sup>++</sup> ions are: Cys, Asp, Glu, His and Tyr, while  
319 Gln is less frequently participates in Fe<sup>++</sup> coordination. The H292Q substitution might  
320 increase the affinity to other ions such as Ca<sup>++</sup>, K<sup>++</sup>, Na<sup>++</sup>, Mg<sup>++</sup>, Mn<sup>++</sup> and Co<sup>++</sup> (Zheng et al.,  
321 2008), which in turn would disturb the catalytic functionality and ANS:Fe(II):2OG:DHQ  
322 cluster formation.

323 To evaluate the frameshift effect in ObANS1\_Perrie at the C-terminal tail, we used  
324 the structural model produced by RaptorX (Supplementary Fig. S6). The model predicts a  
325 rigid lobe composed of twisted alpha-helix, partially blocking the catalytic pocket  
326 (Supplementary Fig. S6). This kind of rigid structure might contain a hydrophobic core,  
327 which stabilizes the enzyme. The electrostatic potential of the frame-shifted C-terminal tail is  
328 different compared to the other variants and characterized by a more positive interface.  
329 Conservation analysis of the C-terminal raises a few conserved positions (Pro-311, Pro-320,  
330 His-341, Lys-345). Phe-334, Ile-338 and Leu-342 participate in DHQ-1 stabilization in the  
331 catalytic site and are absent due to frameshift predictably altering the enzyme's catalytic  
332 activity.

### 333 **Complementation test in Arabidopsis**

334 To validate the functionality of sweet basil ANS enzymes and the effect of the different  
335 sequences variation, we have introduced them into an Arabidopsis accession with a T-DNA  
336 insertion in its' ANS gene. The plants of this Arabidopsis mutant do not accumulate  
337 anthocyanins at all in comparison to their Col-0 background (Bowerman *et al.*, 2012). We

338 have used all four *ObANS* genes and an *ObANS2\_Perrie* with Q → H substitution in position  
339 292 that presumably can fix the causative mutation and restore the enzyme's activity. After  
340 floral dip *Agrobacterium*-mediated transformation, F1 plants were selected on Kanamycin-  
341 containing MS medium, grown on soil and seeds were harvested. F<sub>2</sub> plants from four  
342 independent transformation events were germinated on Kanamycin-containing MS medium  
343 and the color of the plants was evaluated. Plants that acquired the *ObANS1\_Cardinal* or the  
344 *ObANS2\_Perrie\_Q292H* genes showed an anthocyanin accumulating phenotype (Fig. 7). The  
345 anthocyanins were accumulated in the entire plants contrary to the Col-0 WT where they  
346 have been accumulated only in the center of the rosette. Contrary, plants acquired  
347 *ObANS2\_Cardinal*, *ObANS1\_Perrie* or *ObANS2\_Perrie* showed a green phenotype similar to  
348 the phenotype of the Col-0 with T-DNA insertion at the *AtANS* gene.

349

## 350 Discussion

### 351 Color trait and anthocyanidin synthase

352 *Anthocyanidin synthase* encodes the first purple/blue/red color-committing enzyme in the  
353 anthocyanin biosynthetic pathway (Fig. 1). The function and role of ANS were demonstrated  
354 in multiple plants, including *Arabidopsis* (Appelhagen *et al.*, 2011; Pelletier *et al.*, 1997),  
355 apple (Szankowski *et al.*, 2009), onion (Kim *et al.*, 2004; Kim *et al.*, 2005) grape (Gollop *et*  
356 *al.*, 2001), and strawberry (Almeida *et al.*, 2007). Multiple plants carry functional mutations  
357 in their ANS genes, causing non-colored phenotypes. For example, in pomegranates, it was  
358 shown that an insertion in the coding region of *PgANS* gene abolished anthocyanins  
359 accumulation in all plant parts (Ben-Simhon *et al.*, 2015). In apple, it was shown that a viable  
360 ANS gene is critical for plant survival (Szankowski *et al.*, 2009). Yet, in sweet basil,  
361 anthocyanins accumulation did not correlate with drought or salinity stress (Lazarević *et al.*,  
362 2021). Here we showed that two independent mutations in the homeologous genes of basil  
363 ANS are responsible for the all-green phenotype of commercial basil. Moreover, a non-  
364 functional allele of *ObANS2* was found in a purple-flower basil. The causing mutation is  
365 different from the non-functional mutation found in the green basil. Since the active ANS is  
366 dominant over the non-active ones, and there is a redundancy resulting from basil tetraploidy,  
367 it seems that a strong selection was applied towards green varieties, probably influenced by  
368 consumers' demand.

369 While the mutations in the ANS genes clearly explain the green phenotype of 'Perrie'  
370 cultivar, they cannot explain the green leaves phenotype of the 'Cardinal' cultivar. Basils

371 with purple leaves are commercially available and are very popular as ornamentals (Dudai  
372 and Belanger, 2016). They are not limited to a certain chemotype and, although more  
373 common in methyl-chavicol accumulating cultivars, purple eugenol and linalool basils exist  
374 (Liber *et al.*, 2011; Maggio *et al.*, 2016; Varga *et al.*, 2017). Since ‘Cardinal’ and all progeny  
375 have green leaves, it seems that a different mechanism controls the color trait in the leaves in  
376 comparison to the flowers and stem. Phippen and Simon (2000) indicated a two dominant  
377 alleles inheritance mechanism for purple basil color. Since no segregant had purple leaves,  
378 another gene that alters anthocyanins accumulation in the leaves must exist. This gene might  
379 be an active repressor or defective inducer, but it seems that it cause green leaves in both  
380 cultivars. The expression of ANS genes is commonly regulated by MYB transcription factors  
381 in multiple plants (Xu *et al.*, 2015; Zhang *et al.*, 2014). “Non-purple” plants such as tomato  
382 carry a functional ANS gene as was demonstrated in tomato fruits, by exogenous expression  
383 of snapdragon transcription factors (Butelli *et al.*, 2008), and by activation-tagged insertion  
384 lines (Mathews *et al.*, 2003). We speculate that a similar mechanism is active in ‘Cardinal’  
385 flowers and stems, and another different mechanism exists in the leaves of purple basil  
386 cultivars giving them their unique all-purple phenotype.

387 Arabidopsis mutants of the ANS gene have brown seeds (Abrahams *et al.*, 2003;  
388 Abrahams *et al.*, 2002). However, the seeds of ‘Perrie’ cultivar that has two non-functional  
389 ANS proteins are black as the seeds of ‘Cardinal’ cultivar and many other sweet basil  
390 accessions. That suggests, that in contrary to Arabidopsis, the dark color of basil seeds is not  
391 a result of anthocyanins accumulation. Several other phenolics are known to accumulate in  
392 seeds and have dark colors, including phlobaphenes accumulated in corn seeds and oxidized  
393 proanthocyanidins (Corso *et al.*, 2020; Lepiniec *et al.*, 2006). Yet, it seems that multiple  
394 metabolites contribute to the final color of the testa, as has been documented in *Brassica* (Yu,  
395 2013). A detailed liquid-chromatography – mass-spectrometry analysis of basil seed coat may  
396 answer the question of which pigments contribute to the dark appearance of the testa in the  
397 lack of anthocyanins.

### 398 **Basil genomics and genetics**

399 All color traits examined in this study showed disomic segregation with a dominant or  
400 incomplete dominance single gene inheritance model similar to the fusarium resistance trait  
401 (Gonda *et al.*, 2022). That was also supported by the molecular findings of only a single  
402 functional ANS gene in ‘Cardinal’ cultivar. Moreover, the most proximate SNP to *ObANS1*,  
403 7350\_2,452,081, showed a disomic 1:2:1 distribution. On the contrary, the association

404 mapping indicated a QTL on scaffold 120, where *ObANS2* is located. However, both  
405 *ObANS2\_Perrie* and *ObANS2\_Caridnal* are non-functional. Hence, the QTL observed at  
406 scaffold 120 can probably be explained by erroneous mapping of homeolog reads to this  
407 scaffold instead of scaffold 7350. Support for this hypothesis can be found in the high level  
408 of heterozygosity detected in the ‘Cardinal’ parent, which was discussed by Gonda *et al.*  
409 (2022).

410 The large size of the QTL across the entire LG4A is in accordance with the small  
411 genetic distances found. It is currently unclear whether the large QTL is an artifact caused by  
412 genotyping errors, scaffolding errors, basil tetraploidy that causes a bioinformatic hurdle, or a  
413 real biology phenomenon. The parental lines might be too distant from each other, causing  
414 low recombination frequencies, resulting in small genetic distances and large QTLs. Large  
415 QTLs were observed in other corps, especially when located next to the centromere (Galpaz  
416 *et al.*, 2018; Gao *et al.*, 2019). Considering the very narrow QTL found for Fusarium wilt  
417 resistance in the same mapping population (Gonda *et al.*, 2022), the later explanation should  
418 be considered.

#### 419 **Expression of genes coding non-functional proteins**

420 Another aspect of the current research is the high expression of genes encoding non-  
421 functional proteins. Both ‘Perrie’ and ‘Cardinal’ express inactive versions of the ANS gene.  
422 About 65% of the expressed *ObANS* RNA encoded mutant alleles. We have also observed an  
423 expression of mutated genes in the phenylpropanes biosynthesis pathway (Gonda *et al.*,  
424 2020). Phenotypically, polyploids can “allow” themselves to express mutated genes more  
425 than diploids since they have gene redundancy, as in the case of the flower color of  
426 ‘Cardinal’. Moreover, the selection against these mutated versions would be smaller because  
427 of this redundancy. However, this unnecessary expression and probable translation is futile  
428 and has energy costs. When dealing with biosynthetic pathways, such as anthocyanins  
429 biosynthesis, this cost is multiplied by the number of the genes involved. The fact that  
430 ‘Perrie’ was expressing the entire biosynthetic pathway in most of the cases of both  
431 homeologous caused even a greater futile expression effort. There is a long debate on the  
432 beneficiary of being a polyploid and its role in evolution and agriculture (Chen, 2010;  
433 Madlung, 2013). It has been suggested that polyploidy does not contribute to increased  
434 speciation and is an evolutionary dead-end (Mayrose *et al.*, 2011; Wood *et al.*, 2009). Yet,  
435 within domesticate plants, Salman-Minkov *et al.* (2016) showed that polyploidy promoted  
436 diversity and allowed wild polyploids to cope with agricultural niches and conditions.

437 Whatever will be the final answer in this debate, the degree of expression of genes encoding  
438 non-functional proteins and their possible energy cost should be considered. Whether it is  
439 beneficial for an organism to keep biosynthesis pathways “alive” at the expense of energy  
440 cost is another open question to be answered.

#### 441 **Supplementary data**

442 Table S1. Anthocyanins composition in 'Cardinal' cultivar vs. 'Perrie' cultivar.

443 Table S2. Contingency analysis of the phenotype within the purple segregants only.

444 Table S3. Scaffolds distribution to linkage groups.

445 Table S4. Chimeric scaffolds.

446 Table S5. Distribution of anthocyanins biosynthesis genes across sweet basil subgenomes.

447 Table S6. Expression of anthocyanins biosynthesis genes in 'Perrie' and 'Cardinal' flowers  
448 and leaves.

449 Table S7. Percentage identities of nucleotides of *ObANSs*.

450 Table S8. Percentage identities of amino acids of *ObANS* proteins and *AtANS*.

451 Fig. S1 Schematic illustration of the research population.

452 Fig. S2. Map charts of LG 1 and LG 4.

453 Fig. S3. Multiple sequence alignment of sweet basil *ANS* genes.

454 Fig. S4. Conserved residues analysis of *ANS* protein.

455 Fig. S5. A 3-D model structure of the active site of *ObANS2\_Perrie*.

456 Fig. S6. A 3-D model structure for *ObANS1\_Perrie*.

#### 457 **Acknowledgments**

458 The authors wish to thank lab and team members of the Unit of Aromatic and Medicinal  
459 Plants in Newe-Ya'ar Research Center in the past and present. Special thanks to Prof. Asaph  
460 Aharoni and Dr. Elad Oren for helpful discussion and brainstorming.

#### 461 **Author contribution**

462 RM, CA, AS, and MAA performed field and molecular biology experiments. DC and TKA  
463 performed and supervised field experiments. RDK and CA performed biochemistry analysis.

464 AF, OT and IG performed the bioinformatics analyses as well as the data curation. IG wrote  
465 the manuscript. IG and ND conceptualize the research and review the manuscript.

466 **Conflict of interests**

467 Authors declare no conflict of interests.

468 **Data availability**

The raw data of the GBS is available through NCBI short reads archive (SRA) under project number: PRJNA836178.



## References

- Abrahams S, Lee E, Walker AR, Tanner GJ, Larkin PJ, Ashton AR.** 2003. The Arabidopsis TDS4 gene encodes leucoanthocyanidin dioxygenase (LDOX) and is essential for proanthocyanidin synthesis and vacuole development. *The Plant Journal* **35**, 624-636.
- Abrahams S, Tanner GJ, Larkin PJ, Ashton AR.** 2002. Identification and biochemical characterization of mutants in the proanthocyanidin pathway in Arabidopsis. *Plant Physiology* **130**, 561-576.
- Almeida JRM, D'Amico E, Preuss A, Carbone F, de Vos CHR, Deiml B, Mourgues F, Perrotta G, Fischer TC, Bovy AG, Martens S, Rosati C.** 2007. Characterization of major enzymes and genes involved in flavonoid and proanthocyanidin biosynthesis during fruit development in strawberry (*Fragaria × ananassa*). *Archives of Biochemistry and Biophysics* **465**, 61-71.
- Appelhagen I, Jahns O, Bartelniewoehner L, Sagasser M, Weisshaar B, Stracke R.** 2011. Leucoanthocyanidin dioxygenase in *Arabidopsis thaliana*: characterization of mutant alleles and regulation by MYB–BHLH–TTG1 transcription factor complexes. *Gene* **484**, 61-68.
- Ashkenazy H, Abadi S, Martz E, Chay O, Mayrose I, Pupko T, Ben-Tal N.** 2016. ConSurf 2016: an improved methodology to estimate and visualize evolutionary conservation in macromolecules. *Nucleic Acids Research* **44**, W344-W350.
- Ben-Simhon Z, Judeinstein S, Trainin T, Harel-Beja R, Bar-Ya'akov I, Borochoy-Neori H, Holland D.** 2015. A "white" anthocyanin-less pomegranate (*Punica granatum* L.) caused by an insertion in the coding region of the leucoanthocyanidin dioxygenase (LDOX; ANS) gene. *PLoS One* **10**, e0142777.
- Bowerman PA, Ramirez MV, Price MB, Helm RF, Winkel BSJ.** 2012. Analysis of T-DNA alleles of flavonoid biosynthesis genes in Arabidopsis ecotype Columbia. *BMC Research Notes* **5**, 485.
- Butelli E, Titta L, Giorgio M, Mock HP, Matros A, Peterek S, Schijlen EG, Hall RD, Bovy AG, Luo J, Martin C.** 2008. Enrichment of tomato fruit with health-promoting anthocyanins by expression of select transcription factors. *Nature Biotechnology* **26**, 1301-1308.
- Carović-Stanko K, Šalinović A, Grdiša M, Liber Z, Kolak I, Satovic Z.** 2011. Efficiency of morphological trait descriptors in discrimination of *Ocimum basilicum* L. accessions. *Plant Biosystems* **145**, 298-305.
- Chen ZJ.** 2010. Molecular mechanisms of polyploidy and hybrid vigor. *Trends in Plant Science* **15**, 57-71.
- Clough SJ, Bent AF.** 1998. Floral dip: a simplified method for *Agrobacterium* -mediated transformation of *Arabidopsis thaliana*. *Plant Journal* **16**, 735-743.
- Corso M, Perreau F, Mouille G, Lepiniec L.** 2020. Specialized phenolic compounds in seeds: structures, functions, and regulations. *Plant Science* **296**, 110471.
- Dolinsky TJ, Czodrowski P, Li H, Nielsen JE, Jensen JH, Klebe G, Baker NA.** 2007. PDB2PQR: expanding and upgrading automated preparation of biomolecular structures for molecular simulations. *Nucleic Acids Research* **35**, W522-W525.
- Dudai N, Belanger FC.** 2016. Aroma as a factor in the breeding process of fresh herbs – the case of basil. In: Havkin-Frenkel D, Dudai N, eds. *Biotechnology in Flavor Production*, 32-61.
- Dudai N, Li G, Shachter A, Belanger F, Chaimovitsh D.** 2018. Heredity of phenylpropenes in sweet basil (*Ocimum basilicum* L.) chemotypes and their distribution within an F<sub>2</sub> population. *Plant Breeding* **137**, 443-449.
- Falcone Ferreyra ML, Rius S, Casati P.** 2012. Flavonoids: biosynthesis, biological functions, and biotechnological applications. *Frontiers in Plant Science* **3**, 222.
- Flanigan PM, Niemeyer ED.** 2014. Effect of cultivar on phenolic levels, anthocyanin composition, and antioxidant properties in purple basil (*Ocimum basilicum* L.). *Food Chemistry* **164**, 518-526.
- Galpaz N, Gonda I, Shem-Tov D, Barad O, Tzuri G, Lev S, Fei Z, Xu Y, Mao L, Jiao C, Harel-Beja R, Doron-Faigenboim A, Tzfadia O, Bar E, Meir A, Sa'ar U, Fait A, Halperin E, Kenigswald M, Fallik E, Lombardi N, Kol G, Ronen G, Burger Y, Gur A, Tadmor Y, Portnoy V, Schaffer AA, Lewinsohn E, Giovannoni JJ, Katzir N.** 2018. Deciphering genetic factors that determine melon

- fruit-quality traits using RNA-Seq-based high-resolution QTL and eQTL mapping. *Plant Journal* **94**, 169-191.
- Gao L, Gonda I, Sun H, Ma Q, Bao K, Tieman DM, Burzynski-Chang EA, Fish TL, Stromberg KA, Sacks GL, Thannhauser TW, Foolad MR, Diez MJ, Blanca J, Canizares J, Xu Y, van der Knaap E, Huang S, Klee HJ, Giovannoni JJ, Fei Z.** 2019. The tomato pan-genome uncovers new genes and a rare allele regulating fruit flavor. *Nature Genetics* **51**, 1044-1051.
- Gollop R, Farhi S, Perl A.** 2001. Regulation of the leucoanthocyanidin dioxygenase gene expression in *Vitis vinifera*. *Plant Science* **161**, 579-588.
- Gonda I, Faigenboim A, Adler C, Milavski R, Karp M-J, Shachter A, Ronen G, Baruch K, Chaimovitsh D, Dudai N.** 2020. The genome sequence of tetraploid sweet basil, *Ocimum basilicum* L., provides tools for advanced genome editing and molecular breeding. *DNA Research* **27**, dsaa027.
- Gonda I, Milavski R, Adler C, Abu-Abied M, Tal O, Faigenboim A, Chaimovitsh D, Dudai N.** 2022. Genome-based high-resolution mapping of fusarium wilt resistance in sweet basil. *Plant Science*, 111316.
- Holton TA, Cornish EC.** 1995. Genetics and Biochemistry of Anthocyanin Biosynthesis. *The Plant Cell* **7**, 1071-1083.
- Källberg M, Wang H, Wang S, Peng J, Wang Z, Lu H, Xu J.** 2012. Template-based protein structure modeling using the RaptorX web server. *Nature Protocols* **7**, 1511-1522.
- Kim S, Binzel ML, Yoo KS, Park S, Pike LM.** 2004. Pink (P), a new locus responsible for a pink trait in onions (*Allium cepa*) resulting from natural mutations of anthocyanidin synthase. *Molecular Genetics and Genomics* **272**, 18-27.
- Kim S, Jones R, Yoo K-S, Pike LM.** 2005. The *L* locus, one of complementary genes required for anthocyanin production in onions (*Allium cepa*), encodes anthocyanidin synthase. *Theoretical and Applied Genetics* **111**, 120-127.
- Lazarević B, Šatović Z, Nimac A, Vidak M, Gunjača J, Politeo O, Carović-Stanko K.** 2021. Application of phenotyping methods in detection of drought and salinity stress in basil (*Ocimum basilicum* L.). *Frontiers in Plant Science* **12**, 629441.
- Lepiniec L, Debeaujon I, Routaboul J-M, Baudry A, Pourcel L, Nesi N, Caboche M.** 2006. Genetics and biochemistry of seed flavonoids. *Annual Review of Plant Biology* **57**, 405-430.
- Liber Z, Carović-Stanko K, Politeo O, Strikić F, Kolak I, Milos M, Satovic Z.** 2011. Chemical characterization and genetic relationships among *Ocimum basilicum* L. cultivars. *Chemistry & Biodiversity* **8**, 1978-1989.
- Madlung A.** 2013. Polyploidy and its effect on evolutionary success: old questions revisited with new tools. *Heredity* **110**, 99-104.
- Maggio A, Roscigno G, Bruno M, De Falco E, Senatore F.** 2016. Essential-oil variability in a collection of *Ocimum basilicum* L. (basil) cultivars. *Chemistry & Biodiversity* **13**, 1357-1368.
- Mathews H, Clendennen SK, Caldwell CG, Liu XL, Connors K, Matheis N, Schuster DK, Menasco DJ, Wagoner W, Lightner J, Wagner DR.** 2003. Activation tagging in tomato identifies a transcriptional regulator of anthocyanin biosynthesis, modification, and transport. *The Plant Cell* **15**, 1689-1703.
- Mayrose I, Zhan Shing H, Rothfels Carl J, Magnuson-Ford K, Barker Michael S, Rieseberg Loren H, Otto Sarah P.** 2011. Recently formed polyploid plants diversify at lower rates. *Science* **333**, 1257-1257.
- McCance KR, Flanigan PM, Quick MM, Niemeyer ED.** 2016. Influence of plant maturity on anthocyanin concentrations, phenolic composition, and antioxidant properties of 3 purple basil (*Ocimum basilicum* L.) cultivars. *Journal of Food Composition and Analysis* **53**, 30-39.
- Nguyen PM, Niemeyer ED.** 2008. Effects of nitrogen fertilization on the phenolic composition and antioxidant properties of basil (*Ocimum basilicum* L.). *Journal of Agricultural and Food Chemistry* **56**, 8685-8691.

- Olsson MHM, Søndergaard CR, Rostkowski M, Jensen JH.** 2011. PROPKA3: Consistent treatment of internal and surface residues in empirical p*K*<sub>a</sub> predictions. *Journal of Chemical Theory and Computation* **7**, 525-537.
- Paton A, Harley RM, Harley MM.** 1999. *Ocimum*: an overview of classification and relationships. In: Hiltunen R, Holm Y, eds. *Basil*. The Netherlands: Harwood Academic, 1-32.
- Pelletier MK, Murrell JR, Shirley BW.** 1997. Characterization of flavonol synthase and leucoanthocyanidin dioxygenase genes in *Arabidopsis* (further evidence for differential regulation of "early" and "late" genes). *Plant Physiology* **113**, 1437-1445.
- Phippen WB, Simon JE.** 1998. Anthocyanins in basil (*Ocimum basilicum* L.). *Journal of Agricultural and Food Chemistry* **46**, 1734-1738.
- Phippen WB, Simon JE.** 2000. Anthocyanin inheritance and instability in purple basil (*Ocimum basilicum* L.). *Journal of Heredity* **91**, 289-296.
- Polturak G, Aharoni A.** 2018. "La Vie en Rose": Biosynthesis, sources, and applications of betalain pigments. *Molecular Plant* **11**, 7-22.
- Prinsi B, Morgutti S, Negrini N, Faoro F, Espen L.** 2019. Insight into composition of bioactive phenolic compounds in leaves and flowers of green and purple basil. *Plants* **9**, 22.
- Salman-Minkov A, Sabath N, Mayrose I.** 2016. Whole-genome duplication as a key factor in crop domestication. *Nature Plants* **2**, 16115.
- Söding J, Biegert A, Lupas AN.** 2005. The HHpred interactive server for protein homology detection and structure prediction. *Nucleic Acids Research* **33**, W244-W248.
- Szankowski I, Flachowsky H, Li H, Halbwirth H, Treutter D, Regos I, Hanke M-V, Stich K, Fischer TC.** 2009. Shift in polyphenol profile and sublethal phenotype caused by silencing of anthocyanidin synthase in apple (*Malus* sp.). *Planta* **229**, 681-692.
- Tanaka Y, Sasaki N, Ohmiya A.** 2008. Biosynthesis of plant pigments: anthocyanins, betalains and carotenoids. *The Plant Journal* **54**, 733-749.
- Varga F, Carović-Stanko K, Ristić M, Grdiša M, Liber Z, Šatović Z.** 2017. Morphological and biochemical intraspecific characterization of *Ocimum basilicum* L. *Industrial Crops and Products* **109**, 611-618.
- Wilmouth RC, Turnbull JJ, Welford RWD, Clifton IJ, Prescott AG, Schofield CJ.** 2002. Structure and mechanism of anthocyanidin synthase from *Arabidopsis thaliana*. *Structure* **10**, 93-103.
- Wood TE, Takebayashi N, Barker MS, Mayrose I, Greenspoon PB, Rieseberg LH.** 2009. The frequency of polyploid speciation in vascular plants. *Proceedings of the National Academy of Sciences* **106**, 13875-13879.
- Xu W, Dubos C, Lepiniec L.** 2015. Transcriptional control of flavonoid biosynthesis by MYB-bHLH-WDR complexes. *Trends in Plant Science* **20**, 176-185.
- Yu C-Y.** 2013. Molecular mechanism of manipulating seed coat coloration in oilseed Brassica species. *Journal of Applied Genetics* **54**, 135-145.
- Zhang Y, Butelli E, Martin C.** 2014. Engineering anthocyanin biosynthesis in plants. *Current Opinion in Plant Biology* **19**, 81-90.

## Tables

Table 1. Observed and expected colors phenotype in the research population

| Tissue                       | Observed Phenotypes            | Observations | Expected Observations | Tested Ratio | Genetic Model        | $\chi^2$ Square | P - value | DF |
|------------------------------|--------------------------------|--------------|-----------------------|--------------|----------------------|-----------------|-----------|----|
| Stem /<br>Sepals /<br>Bracts | purple:green                   | 136:37       | 130:43                | 3:1          | single dominant      | 1.24            | 0.26      | 1  |
| Sepals                       | pink:white                     | 136:37       | 130:43                | 3:1          | single dominant      | 1.24            | 0.26      | 1  |
| Stem                         | deep purple:light purple:green | 92:44:37     | 43:87:43              | 1:2:1        | incomplete dominance | 76.73           | <0.0001   | 2  |
| Sepals                       | deep purple:light purple:green | 69:67:37     | 43:87:43              | 1:2:1        | incomplete dominance | 17.48           | <0.0001   | 2  |
| Bracts                       | deep purple:light purple:green | 48:88:37     | 43:87:43              | 1:2:1        | incomplete dominance | 1.45            | 0.48      | 2  |

## Figures legends

**Fig. 1** Biosynthesis pathway of anthocyanins. PAL, phenylalanine ammonia-lyase; 4CL, *p*-coumarate CoA ligase; C4H, coumarate 4-hydroxylase; CHS, chalcone synthase; CHI, chalcone isomerase; F3H, flavanone 3-hydroxylase; F3'H, flavonoid 3'-hydroxylase; F3'5'H, flavonoid 3',5'-hydroxylase; DFR, dihydroflavonol 4-reductase; ANS, anthocyanidin synthase; UFGT, UDP-glucose flavonoid 3-*O*-glucosyltransferase. Enzyme names are in italic letters.

**Fig. 2** Color phenotype within the F<sub>2</sub> population. Three representative color phenotypes of the F<sub>2</sub> offspring: green with white sepals (left), light purple with pink petals (middle), and deep-purple with purple petals (right).

**Fig. 3** Association mapping of basil color traits across sweet basil genome scaffolds. Manhattan plots of the QTL for the color of: A. Bract leaves, B. Sepals, C. Stem, D. Petals. The associations of the traits and SNP within the F<sub>2</sub> population were calculated using Tassel with GLM algorithm. Different colors and symbols represent the different scaffolds. Numbers represent: 1, scaffold 120; 2, scaffold 2608; scaffold 393; 4, scaffold 7350.

**Fig. 4** Contingency analysis of the bract leaves color phenotype vs. the allelic composition at site 7350\_2452081. The width of each tile is proportional to the number of segregants with a given allelic composition in scaffold 7350 at position 2,452,081 bp. The height of each tile represents the fraction of the segregants with a given color with a given allelic composition. n=173.

**Fig. 5** Expression levels of ANS genes in sweet basil. The expression of *ObANS1* and *ObANS2* in the parental lines, ‘Perrie’ and ‘Cardinal’, in the flowers and leaves was determined using RNA-seq. Values are the mean of 3 biological repeats  $\pm$  SEM.

**Fig. 6** Multiple sequence alignment of anthocyanidin synthase proteins from sweet basil and Arabidopsis. Comparison between the amino acid sequences of basil ANS enzymes from ‘Perrie’ and ‘Cardinal’. Residues conserved in more than four sequences are black shaded, and similar residues are gray shaded. Shapes and colors represent conserved residues based on the crystallographic structure of AtANS (Wilmouth et al., 2002). AtANS, Arabidopsis thaliana, accession number NP\_194019.1; DHQ, dihydroquercetin.

**Fig. 7** Complementation of the no anthocyanin phenotype in Arabidopsis by *ObANS* genes. The coding sequences of the four *ObANS* were extracted from cDNA, and cloned under the 35S promoter. The Q292H substitution in *ObANS2*\_Perrie was performed using specific primers. The genes were transformed into Arabidopsis plants (Col-0 background) with a T-DNA insertion at the *AtANS* gene. The pictures depict F<sub>2</sub> transgenes grown in MS medium with kanamycin at 20°C with continuous light. Each transgenic plant is representative of an independent transformation event.

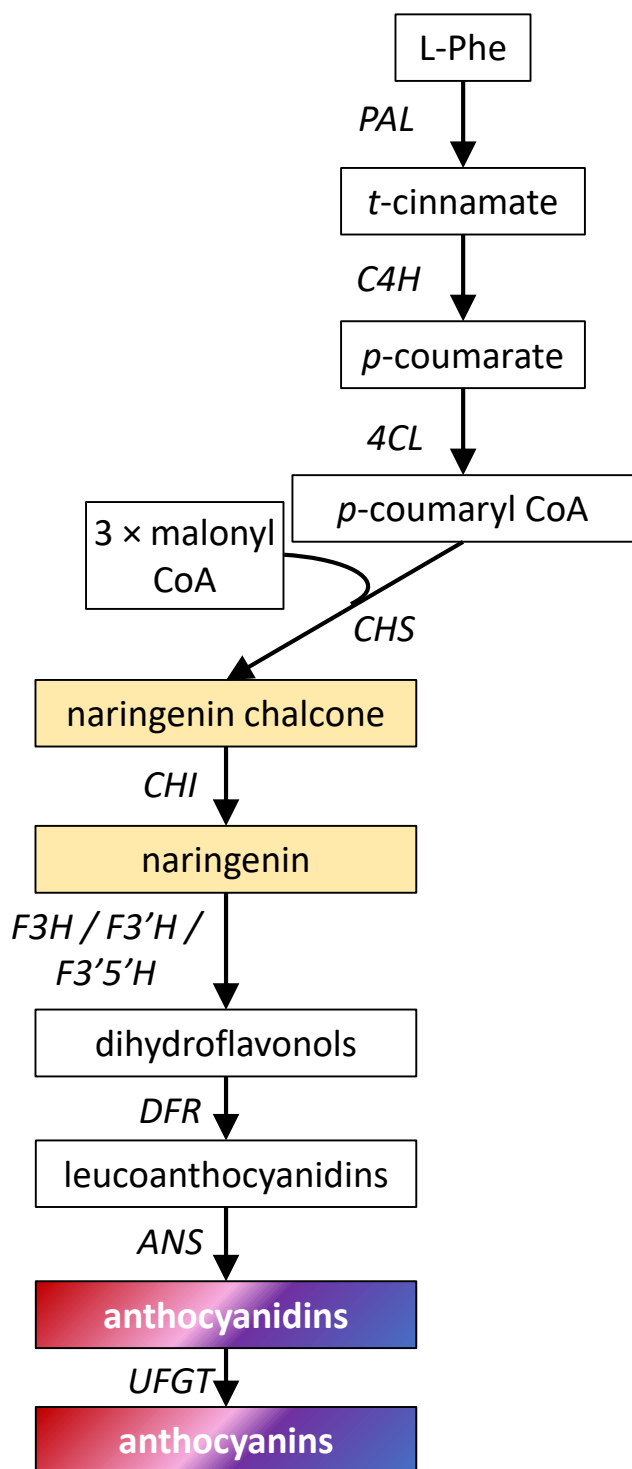

**Fig. 1 Biosynthesis pathway of anthocyanins.** PAL, phenylalanine ammonia lyase; 4CL, *p*-coumarate CoA ligase; C4H, coumarate 4-hydroxylase; CHS, chalcone synthase; CHI, chalcone isomerase; F3H, flavanone 3-hydroxylase; F3'H, flavonoid 3'-hydroxylase; F3'5'H, flavonoid 3',5'-hydroxylase; DFR, dihydroflavonol 4-reductase; ANS, anthocyanidin synthase; UFGT, UDP-glucose flavonoid 3-O-glucosyltransferase. Enzyme names are in italic letters.

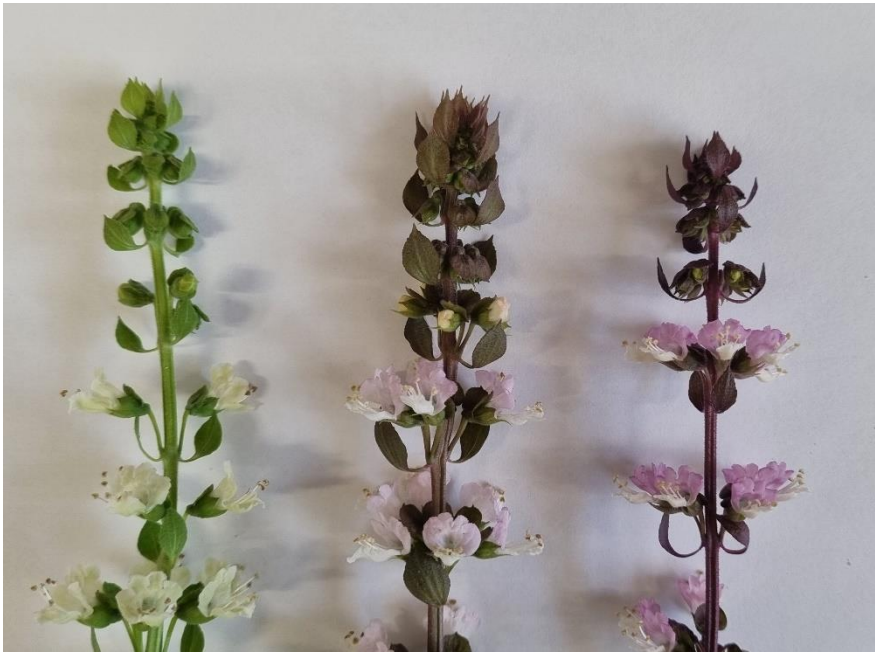

**Figure 2. Color phenotype within the F2 population.**

Three representative color phenotypes of the F2 offspring: green with white sepals (left), light purple with pink petals (middle), deep purple with purple petals (right).

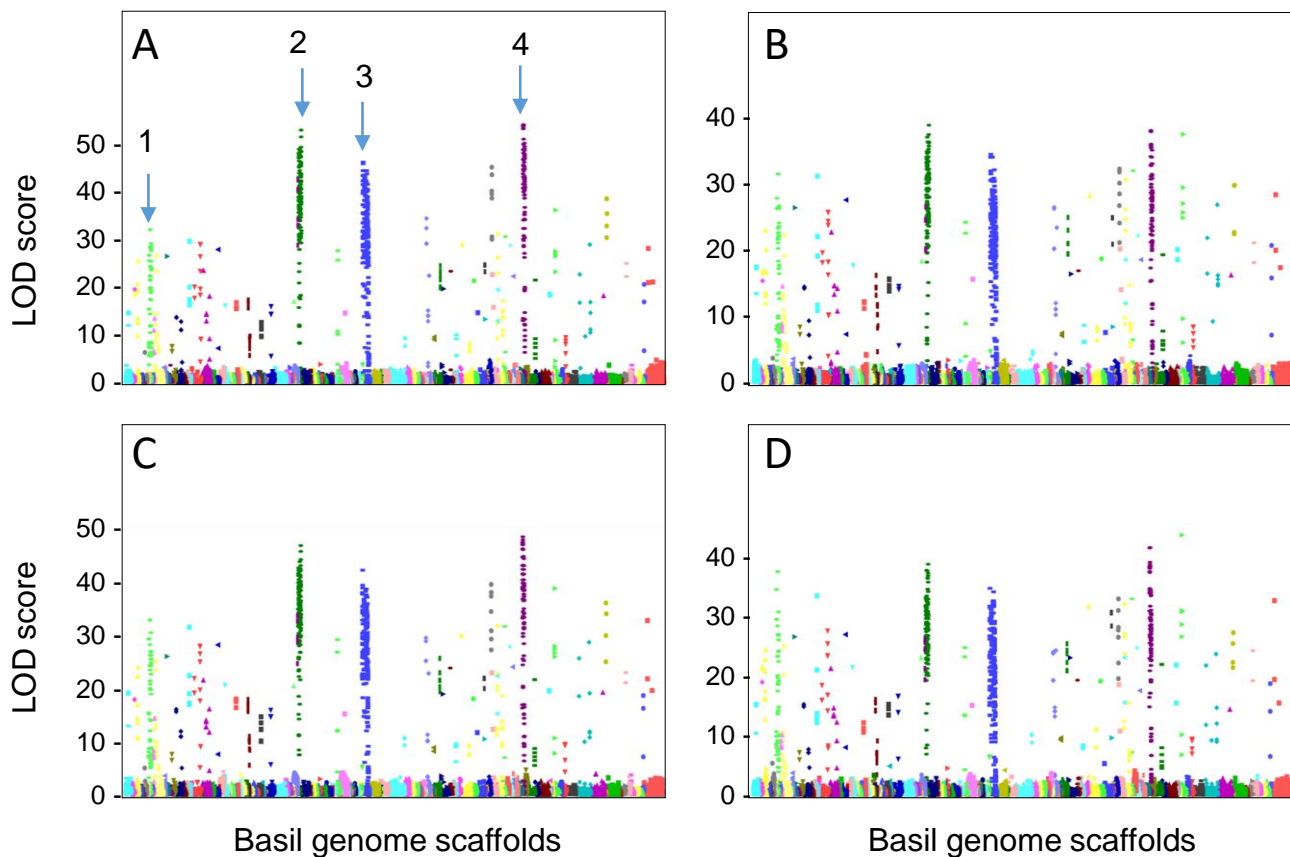

**Fig. 3. Association mapping of basil color traits across sweet basil genome scaffolds.** Manhattan plots of the QTL for the color of: A. Bract leaves, B. Sepals, C. Stem, D. Petals. The associations of the traits and SNP within the F2 population were calculated using Tassel with GLM algorithm. Different colors and symbols represent the different scaffolds. Numbers represent: 1, scaffold 120; 2, scaffold 2608; scaffold 393; 4, scaffold 7350.



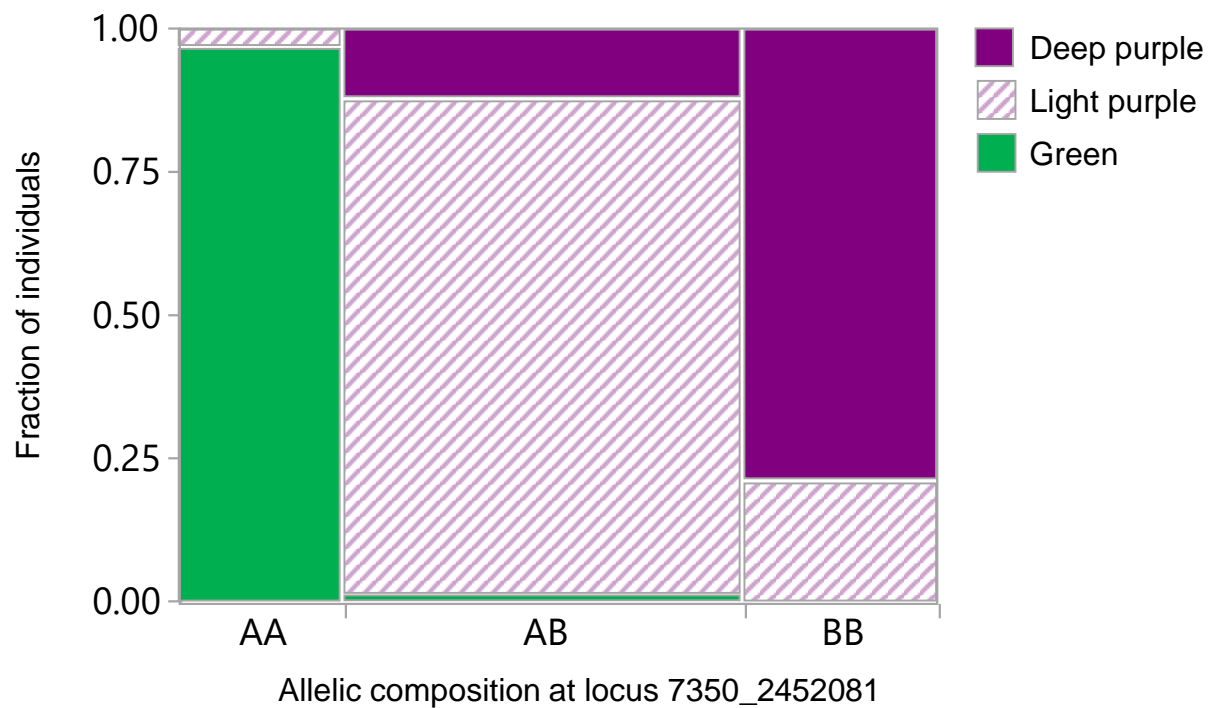

**Figure 4. Contingency analysis of the bract leaves color phenotype vs. the allelic composition at site 7350\_2452081.** The width of each tile is proportional to the number of segregants with a given allelic composition in scaffold 7350 at position 2,452,081 bp. The height of each tile represents the fraction of the segregants with a given color with a given allelic composition. n=173.

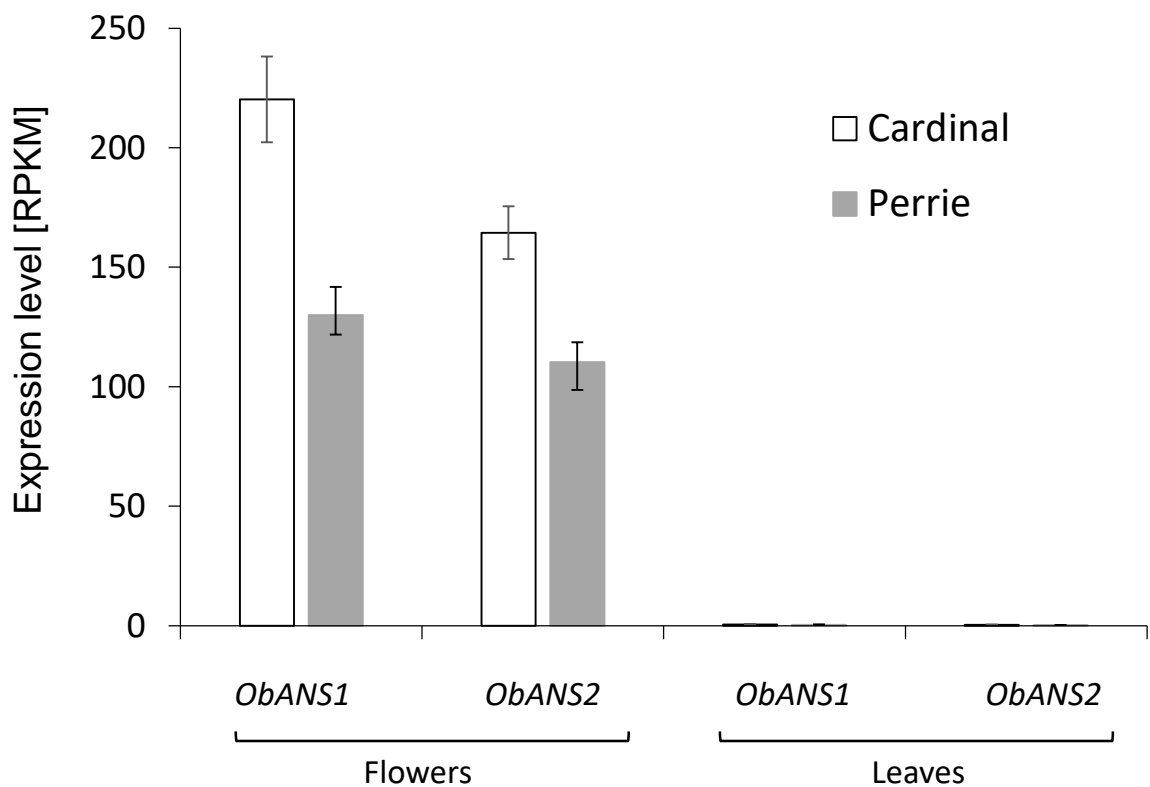

**Figure 5. Expression levels of ANS genes in sweet basil.** The expression of *ObANS1* and *ObANS2* in the parental lines, ‘Perrie’ and ‘Cardinal’, in the flowers and leaves was determined using RNA-seq. Values are mean of 3 biological repeats  $\pm$  SEM.

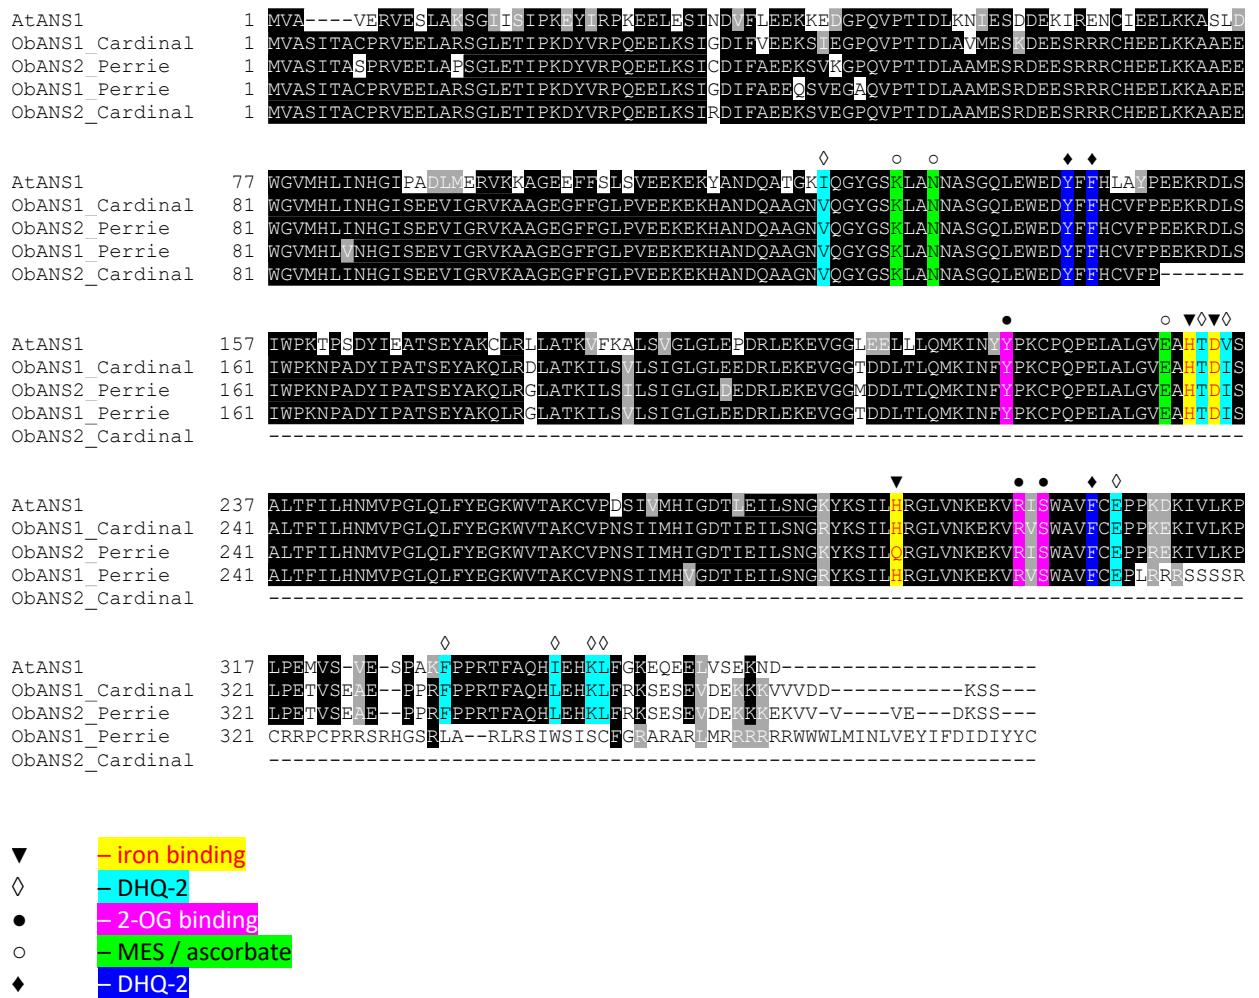

**Figure 6. Multiple sequence alignment of anthocyanidin synthase proteins from sweet basil and Arabidopsis.** Comparison between the amino acid sequences of basil ANS enzymes from ‘Perrie’ and ‘Cardinal’. Residues conserved in more than four sequence are black shaded and similar residues are gray shaded. Shapes and colors represent conserved residues based on the crystallographic structure of AtANS (Wilmouth et al., 2002). AtANS, *Arabidopsis thaliana*, accession number NP\_194019.1.

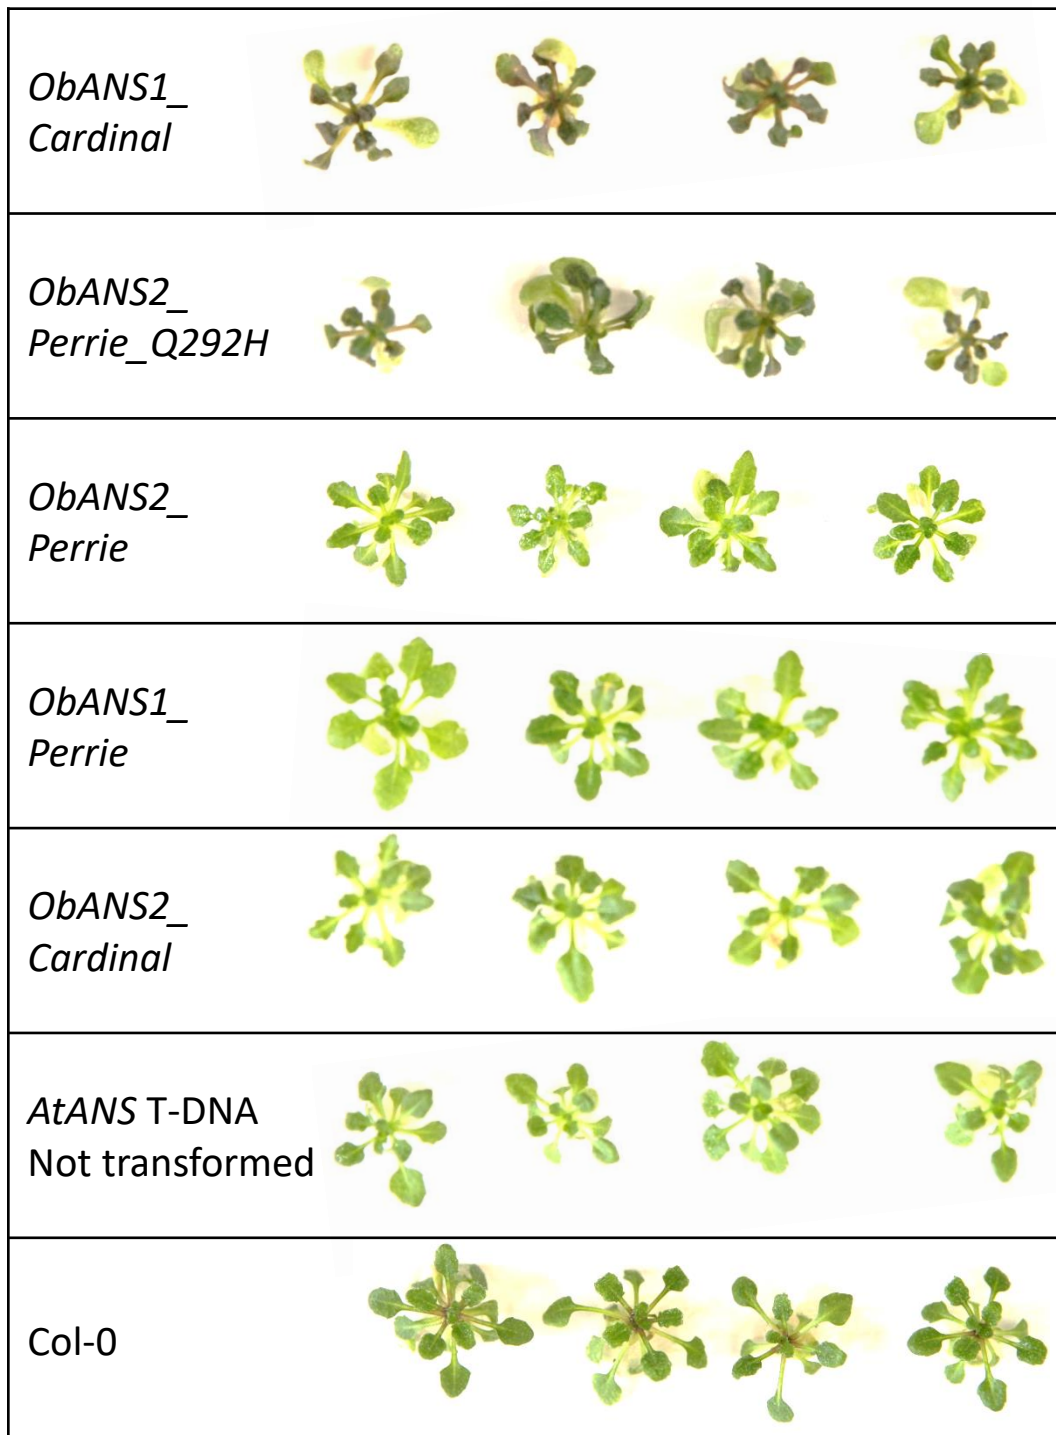

**Figure 7. Complementation of the no anthocyanin phenotype in Arabidopsis by *ObANS* genes.** The coding sequences of the four *ObANS* were extracted from cDNA, and cloned under the 35S promoter. The Q292H substitution in *ObANS2\_Perrie* was performed using specific primers. The genes were transformed into Arabidopsis plants (Col-0 background) with a T-DNA insertion at the *AtANS* gene. The pictures depict F2 transgenes grown in MS medium with kanamycin at 20°C with continuous light. Each transgenic plant is representative of an independent transformation event.
